# Supplementary material for: Structural Basis for the Interaction between Yeast Spt-Ada-Gcn5 Acetyltransferase (SAGA) Complex Components Sgf11 and Sus1
Source: PubMed Central journal article supplement — J Biol Chem. 2009 Dec 9;285(6):3850–6. doi: 10.1074/jbc.M109.070839 (PMC2823527; doi:10.1074/jbc.m109.070839), 2009-12-09
Supplement: supp_M109.070839_jbc.M109.070839-1.pdf [file supp_M109.070839_jbc.M109.070839-1.pdf]

## **Supplementary information**

**Movie S1:** Structure of the Sgf11:Sus1 complex. Sgf11 residues 8-31 are shown in yellow and Sus1 in blue.

**Movie S2:** Overlay of the structure of the Sgf11:Sus1 (yellow, cyan) and Sac3:Sus1 (red, blue) structures. Overall, the fold of Sus1 is conserved albeit helix  $\alpha 1$  varied considerably in position (see also movie S3)

**Movie S3:** Structural plasticity of Sus1 when complexed with Sgf11. In contrast to the Sac3:Sus1 complex, the position of helix  $\alpha 1$  varied considerably between and within crystals.
